# Supplementary material
Source: MDPI journal article supplement (https://www.mdpi.com/2673-9976/6/1/49)

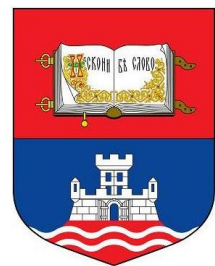

**Foods  
2021**

**The 2nd International Electronic Conference on Foods  
Future Foods and Food Technologies for a Sustainable World**  
15–30 OCTOBER 2021 | ONLINE

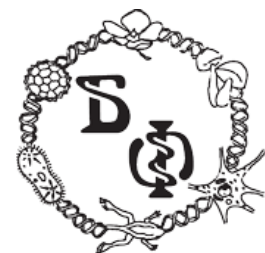

# The marvellous oregano spices

**Mariana Oalđe<sup>1\*</sup>, Tanja Lunić<sup>2</sup>, Marija Mandić<sup>2</sup>,  
Ana Alimpić Aradski<sup>1</sup>, Sonja Duletić-Laušević<sup>1</sup>,  
Biljana Božić Nedeljković<sup>2</sup>**

---

*<sup>1</sup>University of Belgrade, Faculty of Biology, Institute of Botany and Botanical Garden  
“Jevremovac”, 11000 Belgrade, Serbia*

*<sup>2</sup>University of Belgrade, Faculty of Biology, Institute of Physiology and Biochemistry “Ivan  
Đaja”, 11000 Belgrade, Serbia*

**\*corresponding author: [marianao@bio.bg.ac.rs](mailto:marianao@bio.bg.ac.rs)**

# Background

---

The genus *Origanum* comprises 44 species, with a number of spicy, medicinal, fragrant and ornamental plants. These are perennial, herbaceous plants.

Species from this genus are distributed from the Mediterranean region to Euroasia, and their natural habitats are rocky mountains and limestone lands.

*Origanum majorana* and *O. vulgare* are highly valued spices in cookery all over the world.

*Origanum* species have a range of biologically active substances such as phenolic acids (rosmarinic acid), flavonoids, triterpenes (ursolic acid) and tannins, showing numerous promoting human health effects.

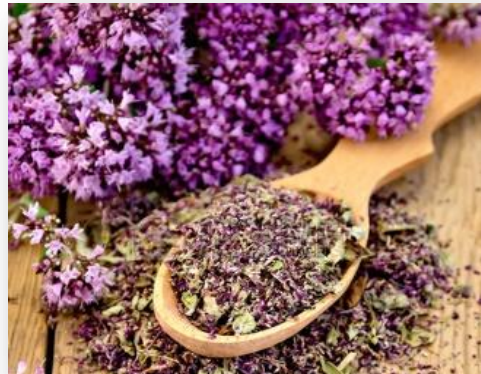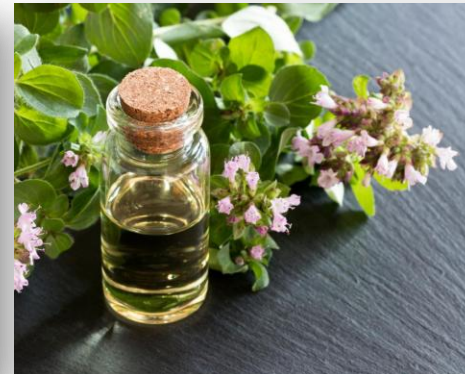

# Aim

---

People are constantly using plants with health-boosting properties, such as oregano species, in their daily diet. Nowadays these plants, characterized as potential **functional foods**, are being extensively scientifically analyzed.

Bearing that in mind, as well as the fact that **neurodegenerative diseases** such as Alzheimer's and Parkinson's are affecting millions of people worldwide, **this study was defined to assess the**

1. antineurodegenerative,
2. antineuroinflammatory, and
3. neuroprotective potential

of ethanolic extracts of *Origanum majorana* (marjoram) and *O. vulgare* (oregano) from Serbia.

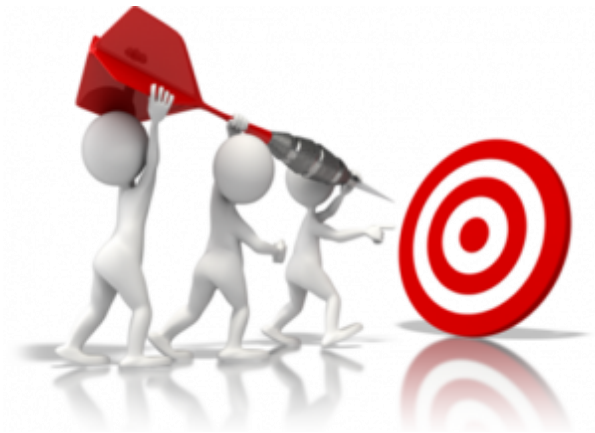

# Material and methods

---

The plant material was obtained from the Institute for Medicinal Plant Research “Dr. Josif Pančić”, Serbia.

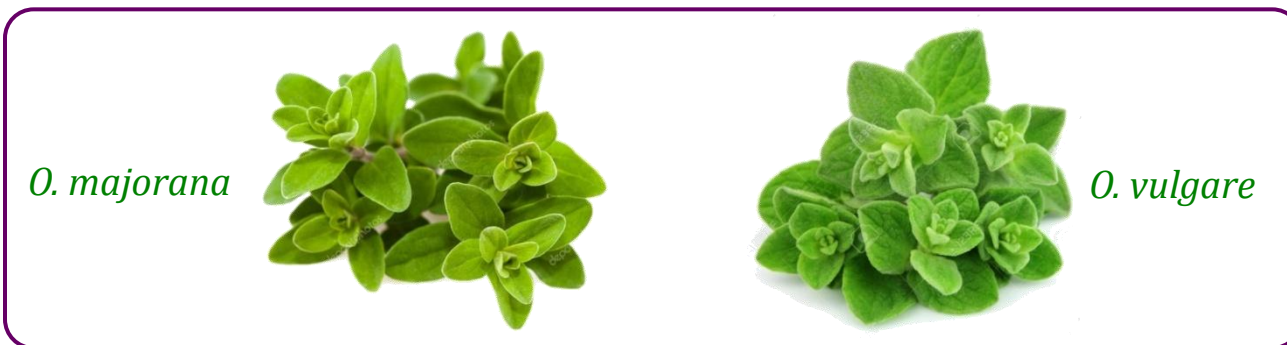

**The extracts** were prepared using classic maceration protocol and 70% ethanol as extraction solvent.

The acetylcholinesterase (AChE) and tyrosinase (TYR) inhibition were used to examine the **antineurodegenerative activity**.

Microglial (BV2) cells stimulated with LPS were used to evaluate the **antineuroinflammatory activity** in MTT, NBT, and Griess assays.

Neuronal (SH-SY5Y) cells were used to determine the **neuroprotective activity** of the extracts in MTT and Griess assays.

# Results

## Antineurodegenerative effects

The results suggest that **oregano extract** is slightly better at inhibiting AChE and TYR (68% vs. 61% at 0.1 mg/mL) than marjoram extract (53% vs. 59% at 0.1 mg/mL), while both of them are **more active than the positive controls** (galantamine 41% vs. kojic acid 25% at 0.1 mg/mL).

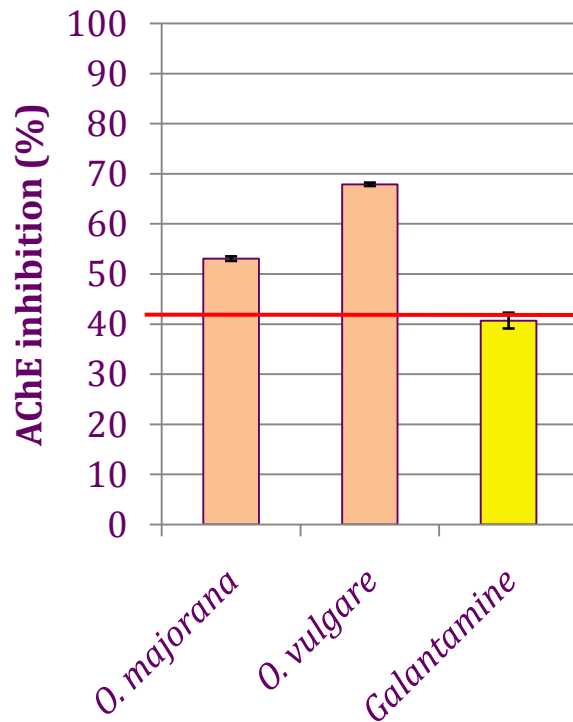

Figure 1. AChE inhibition

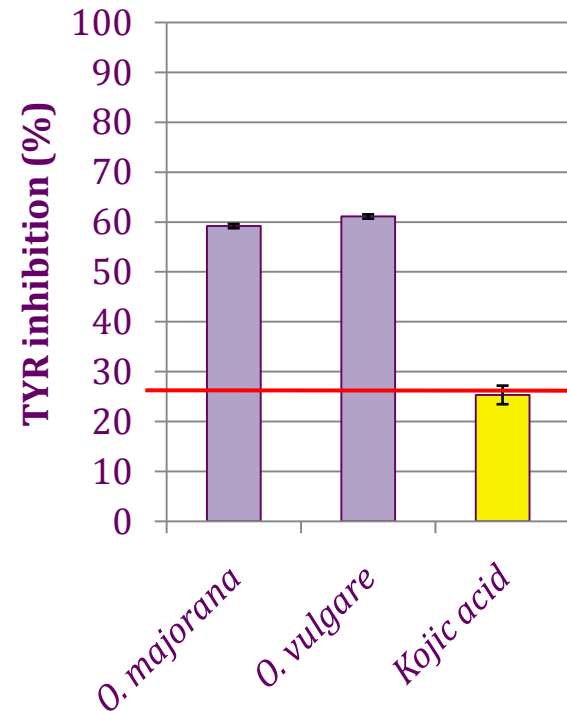

Figure 2. TYR inhibition

# Results

## Antineuroinflammatory effects

**Both extracts** normalized LPS-stimulated BV2 cells' viability while also reducing their production of inflammatory mediators, reactive oxygen species and nitric oxide (NO), to the level of untreated cells (control).

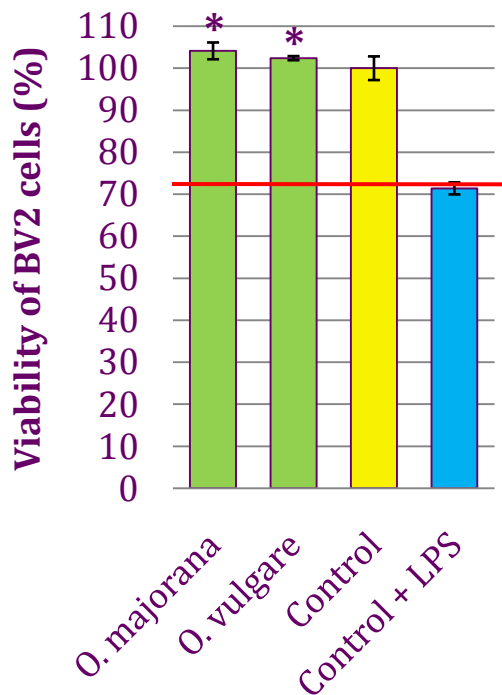

Figure 3. MTT assay

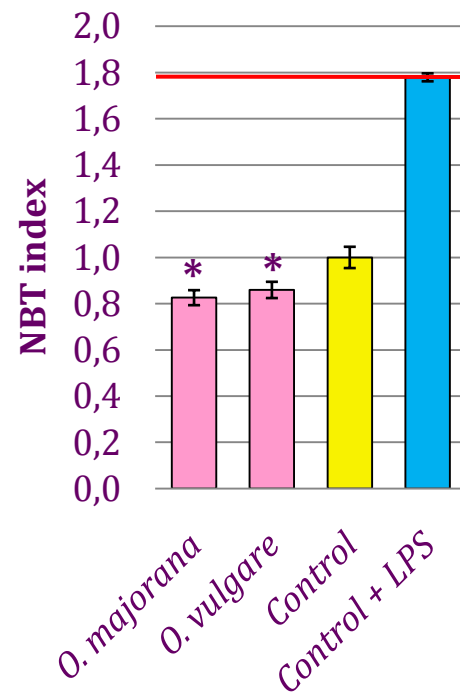

Figure 4. NBT assay

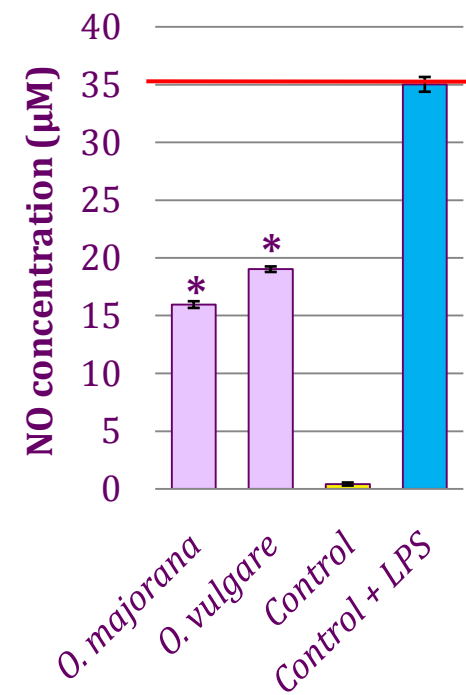

Figure 5. Griess assay

**NBT index** – ratio between absorbance of treated cells and untreated control - calculated on 100% viable cells

# Results

## Neuroprotective effects

Supernatants of LPS-stimulated BV2 cells that were previously treated with **both extracts** normalized the viability of neurons as well as their production of NO compared to the control neurons (treated with supernatants of LPS-stimulated BV2 that were not previously treated with the extracts).

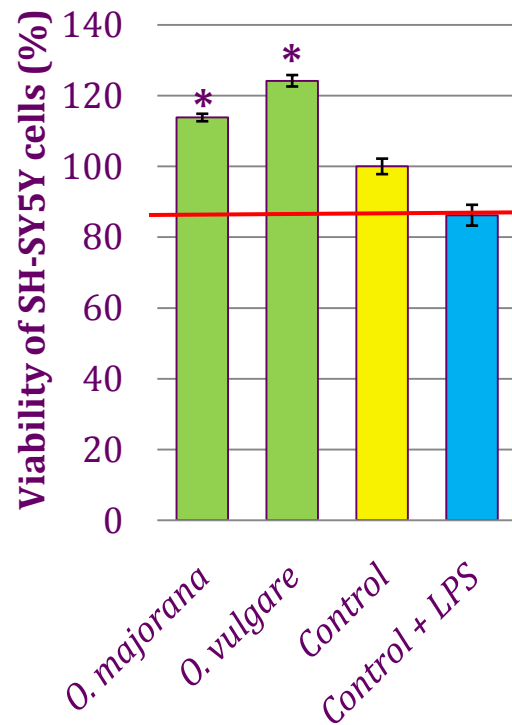

Figure 6. MTT assay

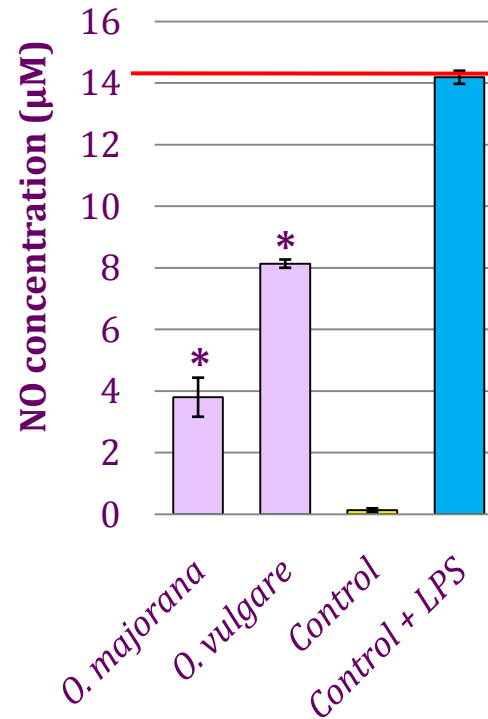

Figure 7. Griess assay

# Conclusions

---

**Both extracts** exhibited noticeable antineurodegenerative, antineuroinflammatory and neuroprotective activities, representing **powerful sources of phytochemicals with promising overall neuroprotective activity**, which could be further examined for potential dietary supplement manufacturing.

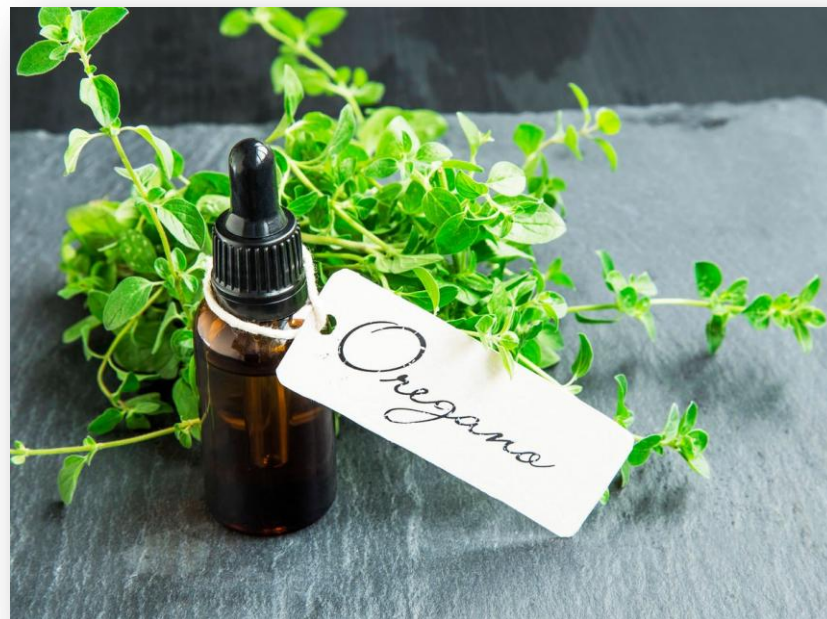

# Acknowledgments

---

This work was funded by the Ministry of Education and Science of the Republic of Serbia, contract number 451-03-68/2020-14/200178.

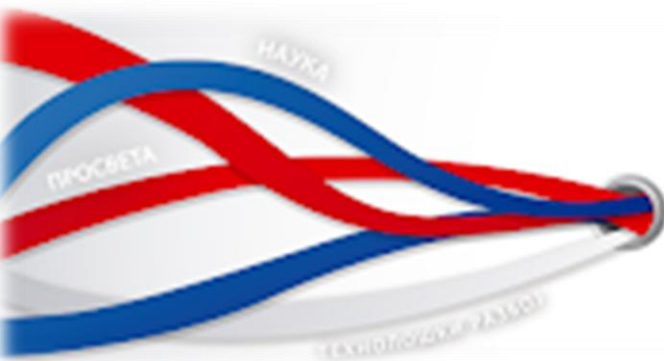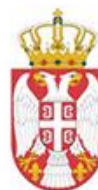

Република Србија  
МИНИСТАРСТВО ПРОСВЕТЕ,  
НАУКЕ И ТЕХНОЛОШКОГ РАЗВОЈА

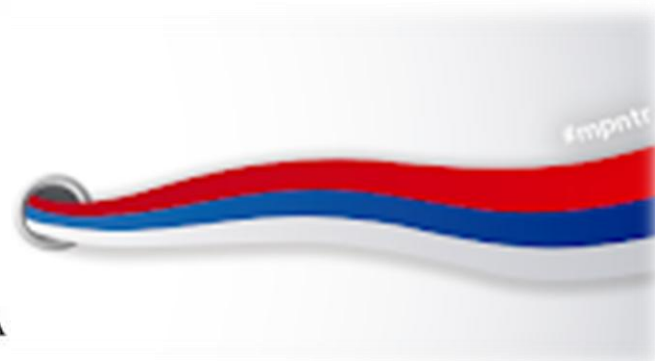

Supplement: s1 [file s1]
